# Supplementary material
Source: PubMed Central journal article supplement (PMC2934703)

## SUPPLEMENTARY FIGURES

### **Supplementary Figure 1**

The peptide GGL27, and the control peptides GGL27(S), having the central K/R residues replaced by S, and the peptide DSE25, from the N-terminus of TFPI were analyzed for antimicrobial activities against the indicated bacteria and fungi. The inhibitory zones of the peptides are indicated. For determination of antimicrobial activities, bacteria ( $4 \times 10^6$  cfu) or fungi ( $1 \times 10^5$  cfu) were inoculated in 0.1% TSB agarose gel. Each 4 mm-diameter well was loaded with 6  $\mu$ l of peptide (at 100  $\mu$ M). The zones of clearance correspond to the inhibitory effect of each peptide after incubation at 37 °C for 18-24 h (mean values are presented, n=3). \*indicates zero values.

### **Supplementary Figure 2**

Similarly as in Figure 2B, bacteria were incubated with GGL27 and permeabilization was assessed using the impermeant probe FITC.

### **Supplementary Figure 3**

The time-dependence of bacterial killing by the indicated TFPI-derived peptides (at 30  $\mu$ M) in 0.15 M NaCl, 10 mM Tris, pH 7.4 containing 20% plasma was analyzed by viable count assays using *E. coli* and *P. aeruginosa*.

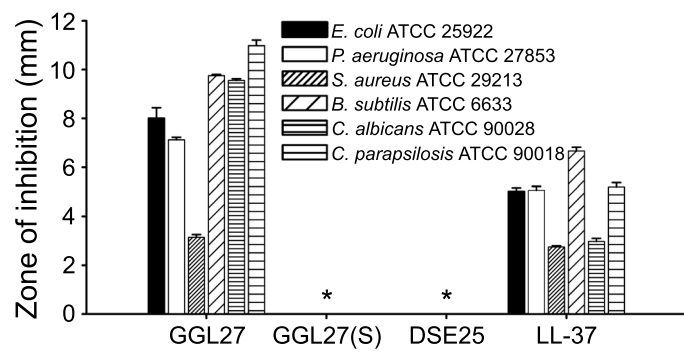

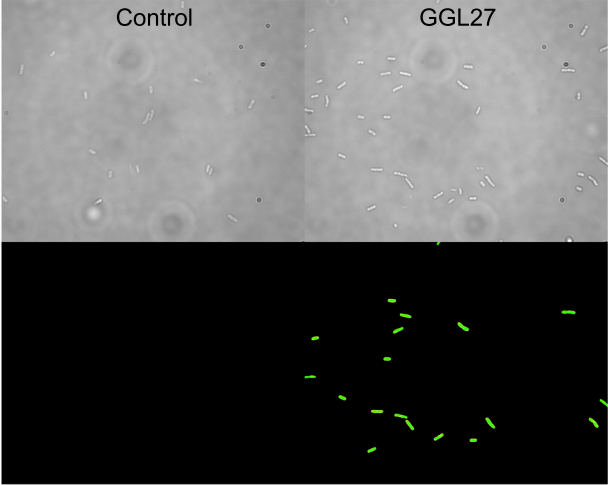

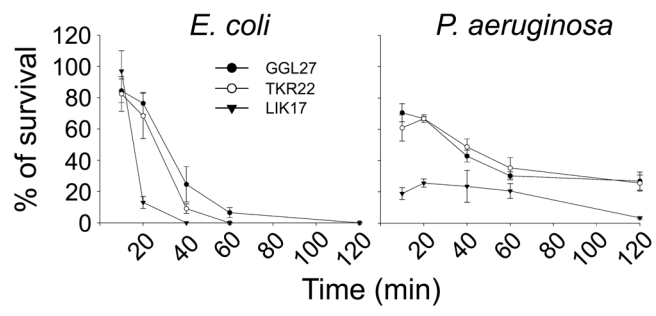

Supplement: supp_M110.127019_jbc.M110.127019-1.pdf [file supp_M110.127019_jbc.M110.127019-1.pdf]
